# Supplementary material for: Association Between the Triglyceride-glucose index and Cardiovascular Risk in ACS Patients with Impaired Renal Function
Source: Research Square preprint supplement (doi:10.21203/rs.3.rs-8213962/v1), 2025-12-31
Supplement: Supplementary file 1 [file bb57592645250f37870508e9.docx]

**Supplementary materials**

Figure S1: Distribution of the TyG index in the overall study population and participants with eGFR<60mL/min.

Table S1: Covariate selection for Model 3.

| Figure S1: Distribution of the TyG index in the overall study population (A) and participants with eGFR<60mL/min (B). |
| --- |

Table S1: Covariate retained and removed in three stages

| Variables | Stage 1 (simple regression) | | |  | Stage 2 (basic model) | | |  | Stage 3 (complete model) | | |
| --- | --- | --- | --- | --- | --- | --- | --- | --- | --- | --- | --- |
|  | *β*1 | 95 % CI | *P* |  | *β*2 | Δ*β* | % change in *β* |  | *β*3 | Δ*β* | % change in *β* |
| TyG index | 0.365 | - | - |  | 0.365 | - | - |  | 0.239 | - | - |
| Type of ACS |  |  |  |  | 0.301 | - 0.064 | **17.55*** |  | 0.325 | 0.086 | **36.04*** |
| STEMI | -0.114 | 0.663 ~ 1.203 | 0.455 |  |  |  |  |  |  |  |  |
| NSTEMI | -1.011 | 0.258 ~ 0.514 | <0.001 |  |  |  |  |  |  |  |  |
| DAPTb | -0.822 | 0.297 ~ 0.650 | <0.001 |  | 0.341 | - 0.024 | 6.62 |  | 0.260 | 0.021 | 6.36 |
| ACEI/ARB | -0.872 | 0.308 ~ 0.568 | <0.001 |  | 0.359 | - 0.007 | 1.78 |  | 0.271 | 0.032 | **12.27*** |
| β-blocker | -1.117 | 0.252 ~ 0.424 | <0.001 |  | 0.316 | - 0.050 | **13.58*** |  | 0.253 | 0.013 | 4.94 |
| Statinb | -1.314 | 0.177 ~ 0.408 | <0.001 |  | 0.351 | - 0.014 | 3.91 |  | 0.241 | 0.002 | 0.71 |
| Diabetesb | 0.286 | 1.034 ~ 1.715 | 0.027 |  | 0.336 | - 0.029 | 8.02 |  | 0.240 | 0.000 | 0.12 |
| Smokinga | -0.175 | 0.605 ~ 1.164 | 0.293 |  | - | - | - |  | - | - | - |
| CAGb | -1.003 | 0.276 ~ 0.487 | <0.001 |  | 0.371 | 0.005 | 1.48 |  | 0.222 | - 0.017 | 6.92 |
| Hemoglobinb | -0.010 | 0.984 ~ 0.996 | 0.002 |  | 0.365 | 0.000 | 0.03 |  | 0.240 | 0.001 | 0.45 |
| HDL-C | -0.594 | 0.355 ~ 0.859 | 0.008 |  | 0.323 | - 0.043 | **11.66*** |  | 0.217 | - 0.022 | 9.12 |
| LDL-C | -0.212 | 0.688 ~ 0.951 | 0.01 |  | 0.398 | 0.033 | 9.06 |  | 0.273 | 0.034 | **15.74*** |
| HbA1cb | 0.085 | 1.008 ~ 1.176 | 0.032 |  | 0.352 | - 0.013 | 3.61 |  | 0.241 | 0.002 | 0.62 |
| FT3 | -0.435 | 0.560 ~ 0.748 | <0.001 |  | 0.304 | - 0.062 | **16.84*** |  | 0.237 | - 0.003 | 1.08 |
| FT4b | 0.067 | 1.033 ~ 1.107 | <0.001 |  | 0.372 | 0.007 | 1.89 |  | 0.246 | 0.007 | 3.00 |
| LVEF | -0.051 | 0.941 ~ 0.961 | <0.001 |  | 0.323 | - 0.043 | **11.72*** |  | 0.303 | 0.064 | **25.94*** |
| LVEDDb | 0.025 | 1.009 ~ 1.042 | 0.002 |  | 0.384 | 0.019 | 5.12 |  | 0.249 | 0.009 | 3.10 |
| TC | -0.196 | 0.716 ~ 0.944 | 0.005 |  | 0.466 | 0.100 | **27.48*** |  | 0.201 | - 0.038 | **15.29*** |

Abbreviations as the same as the Table 1.

*β*1: Univariate regression coefficients for the independent (TyG index) and the convariate to MACE.

*β*2: Regression conefficient of TyG index on MACE after adding covariates in turn.

*β*3: Regression conefficient of TyG index on MACE after deleting convariates in the complete model.

- Not applicable or removed in stage 1.

Bold values* denote the change of the regression coefficient (*β*) of the TyG index on MACE≥10%.

a Covariate removed at stage 1.

b Covariate removed at stage 2 and stage 3.
